# Supplementary material for: Fabrication of α-Fe2O3–γ-Al2O3core–shell nanofibers and their Cr(vi) adsorptive properties
Source: Royal Society of Chemistry journal article supplement (doi:10.1039/c4ra03692a), 2014-09-03
Supplement: c4ra03692a1.pdf [file c4ra03692a1.pdf]

## Supporting Information

### Fabrication of $\alpha\text{-Fe}_2\text{O}_3/\gamma\text{-Al}_2\text{O}_3$ Core/Shell Nanofibers and their Cr(VI) Adsorptive Properties

Xiang Li, Rui Zhao, Bolun Sun, Xiaofeng Lu, Chengcheng Zhang, Zhaojie Wang and Ce Wang

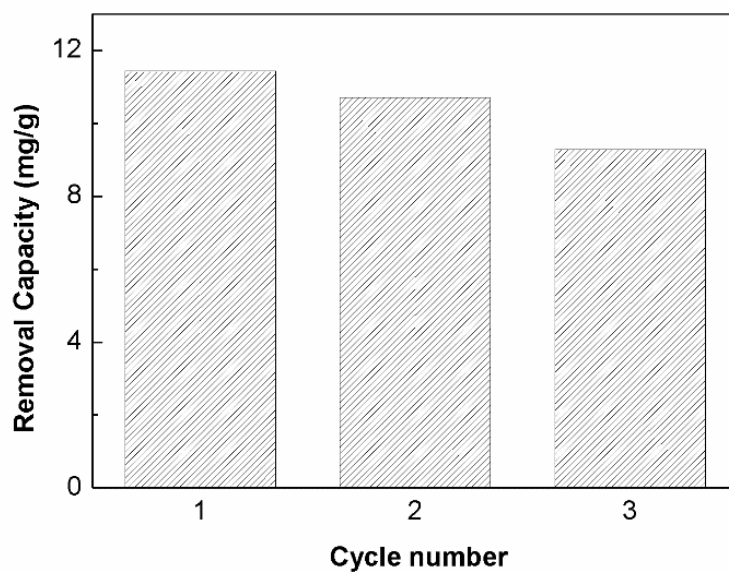

**Fig. S1** Regeneration studies of  $\alpha\text{-Fe}_2\text{O}_3/\gamma\text{-Al}_2\text{O}_3$  core/shell nanofibers after three cycles.
